# Supplementary material for: Synthesis and electronic properties of N-heterocyclic carbene-containing conducting polymers with coinage metals
Source: Royal Society of Chemistry journal article supplement (doi:10.1039/c5ra12176k), 2015-01-01
Supplement: c5ra12176k1.pdf [file c5ra12176k1.pdf]

# Synthesis and Electronic Properties of *N*-Heterocyclic Carbene-conducting coinage metallopolymer

Chinnadurai Satheeshkumar,<sup>1</sup> Ji-Young Park,<sup>1</sup> Dong-Cheol Jeong,<sup>1</sup> Sung Gu Song,<sup>1</sup> Jaemin Lee,<sup>2</sup>  
and Changsik Song\*,<sup>1</sup>

<sup>1</sup>*Department of Chemistry, Sungkyunkwan University, Suwon, Gyeonggi 440-746, Republic of  
Korea*

<sup>2</sup>*Korea Research Institute of Chemical Technology (KRICT), Daejeon 305-600, Republic of  
Korea*

E-mail: [songcs@skku.edu](mailto:songcs@skku.edu)

|                  | <b>Contents</b>                                                                                    | <b>Page No</b> |
|------------------|----------------------------------------------------------------------------------------------------|----------------|
| <b>Figure S1</b> | XPS spectra of <b>Poly(BT-NHC-AgCl)</b> , <b>Poly(BT-NHC-AgCl)</b><br>and <b>Poly(BT-NHC-AuCl)</b> | <b>S2</b>      |
| <b>Figure S2</b> | <sup>1</sup> H-NMR spectrum of <b>BT-NHC-CuCl</b>                                                  | <b>S3</b>      |
| <b>Figure S3</b> | <sup>13</sup> C-NMR spectrum of <b>BT-NHC-CuCl</b>                                                 | <b>S4</b>      |
| <b>Figure S4</b> | <sup>1</sup> H-NMR spectrum of <b>Br-NHC-CuCl</b>                                                  | <b>S5</b>      |
| <b>Figure S5</b> | <sup>13</sup> C-NMR spectrum of <b>Br-NHC-CuCl</b>                                                 | <b>S6</b>      |

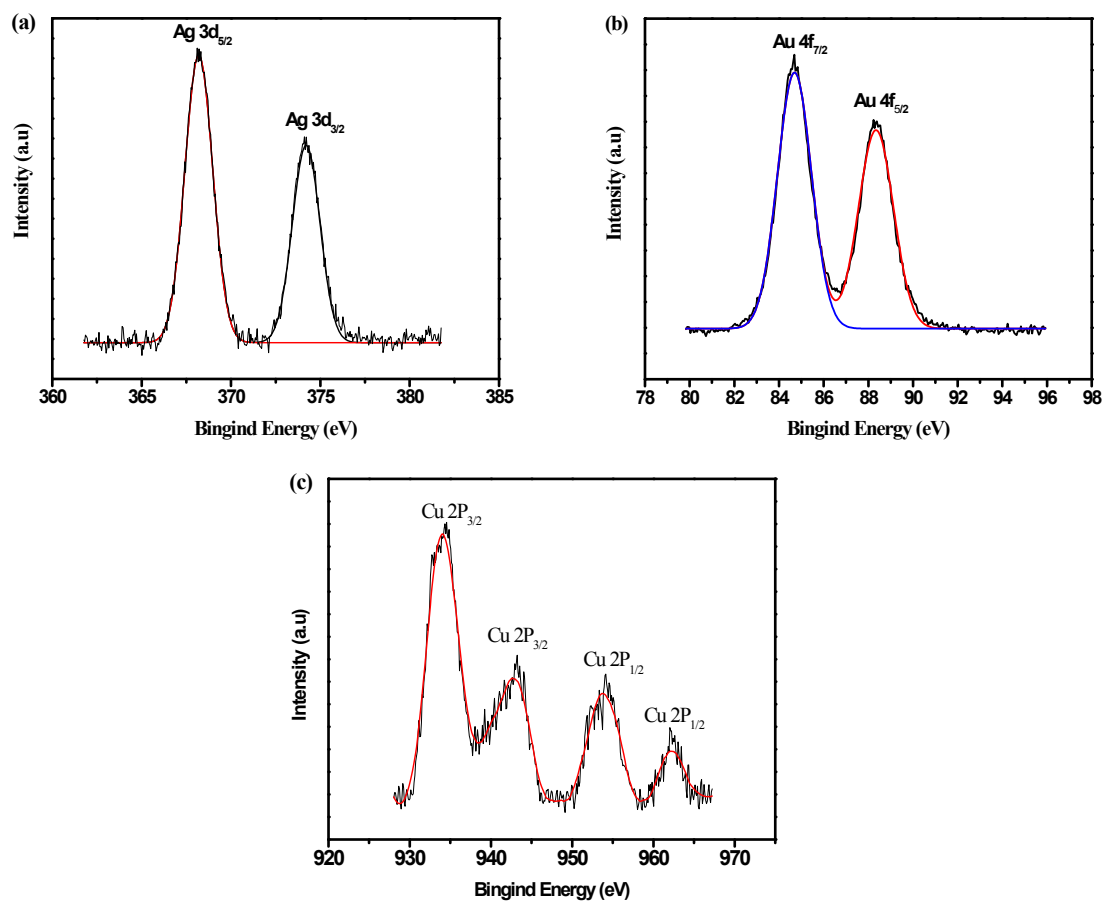

**Figure S1.** X-ray photoelectron spectra of (a) Poly(BT-NHC-AgCl), (b) Poly(BT-NHC-AuCl) and (c) Poly(BT-NHC-CuCl)

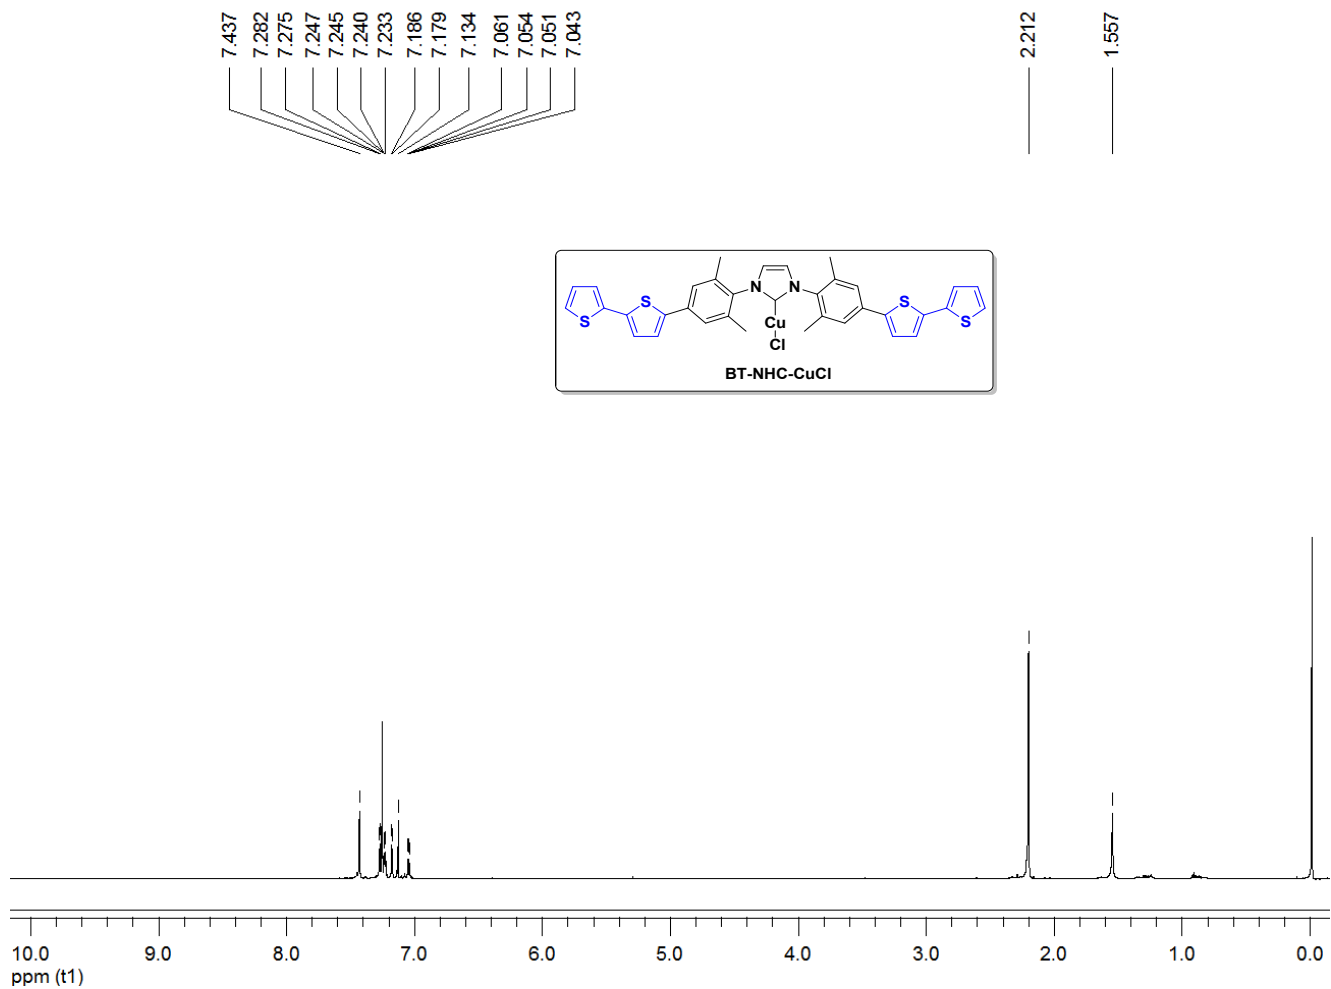

**Figure S2.**  $^1\text{H}$  NMR spectrum of **BT-NHC-CuCl** (500 MHz,  $\text{CDCl}_3$ )

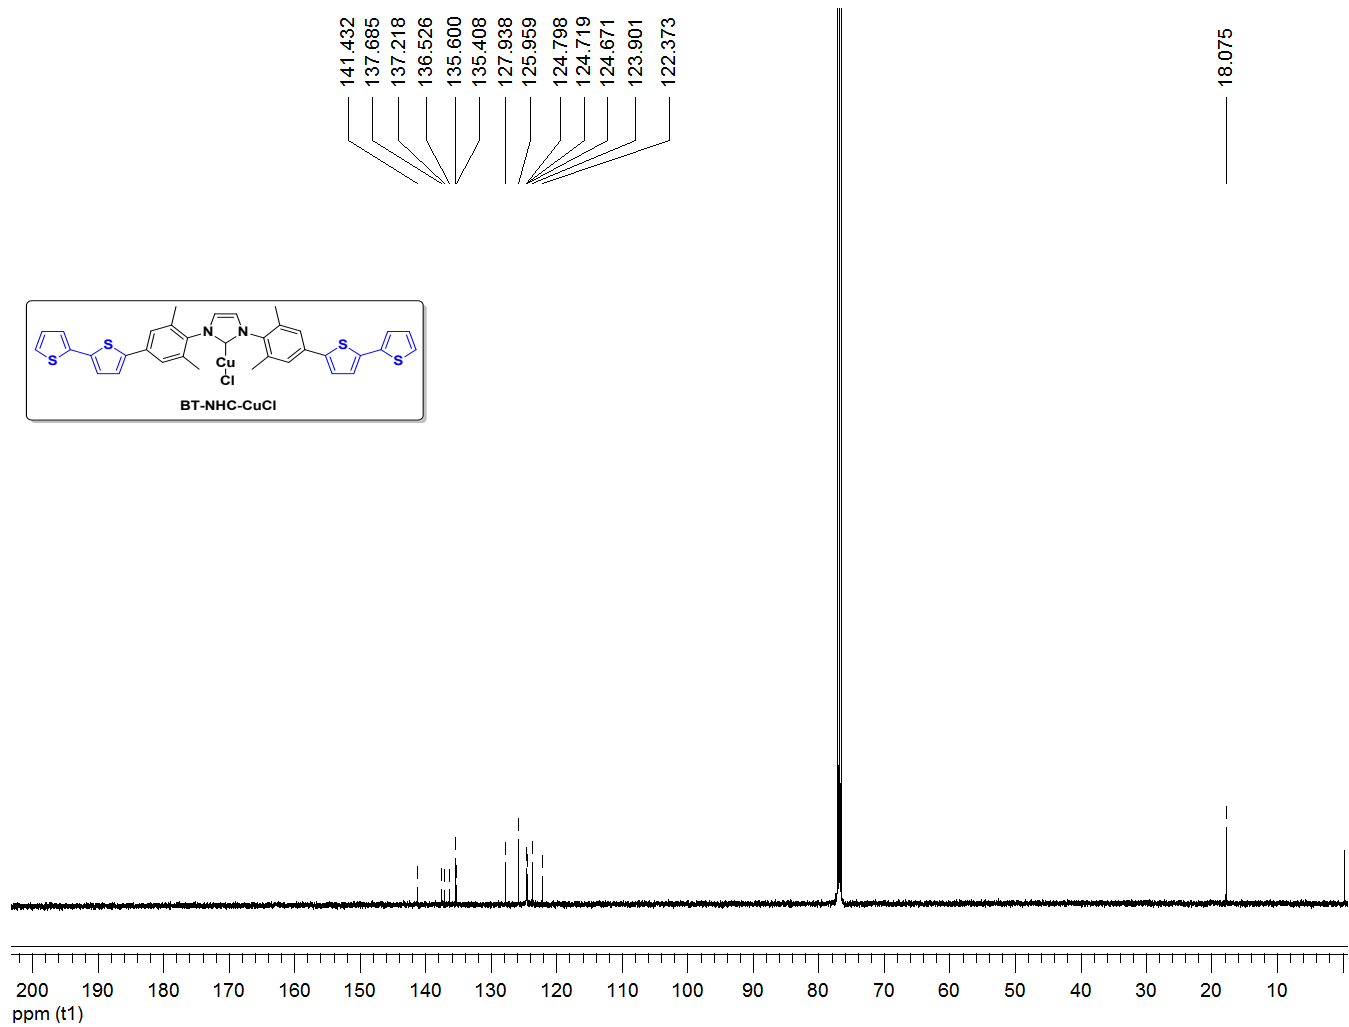

**Figure S3.** <sup>13</sup>C NMR spectrum of **BT-NHC-CuCl** (125 MHz, CDCl<sub>3</sub>)

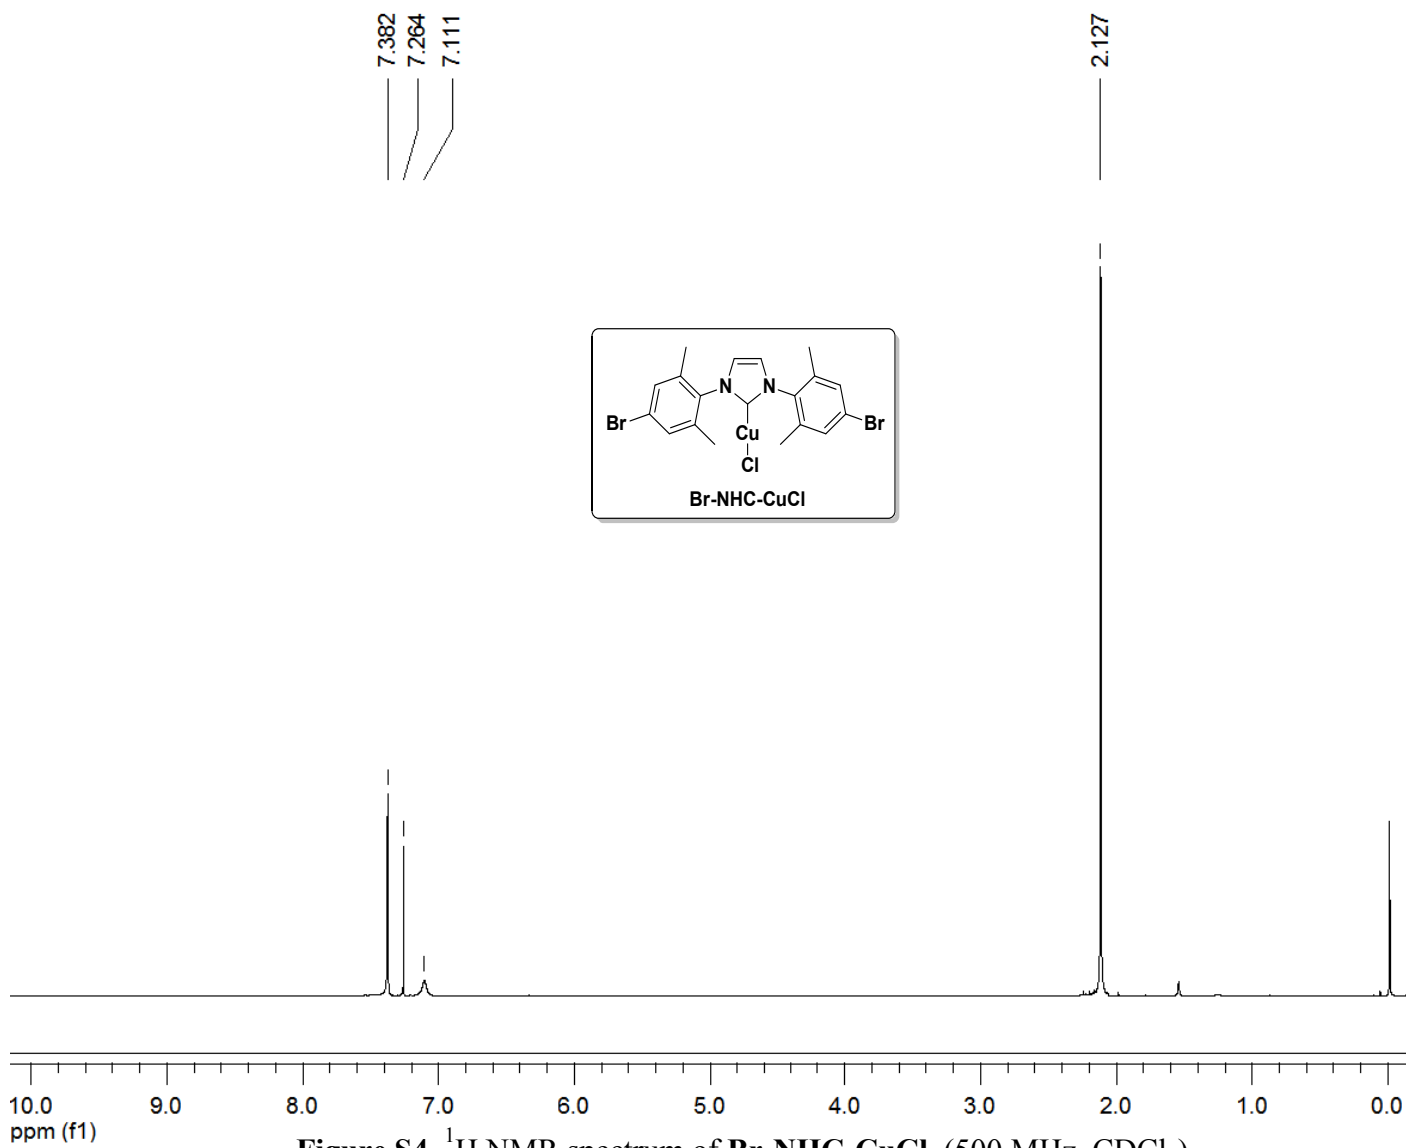

Figure S4.  $^1\text{H}$  NMR spectrum of Br-NHC-CuCl (500 MHz,  $\text{CDCl}_3$ )

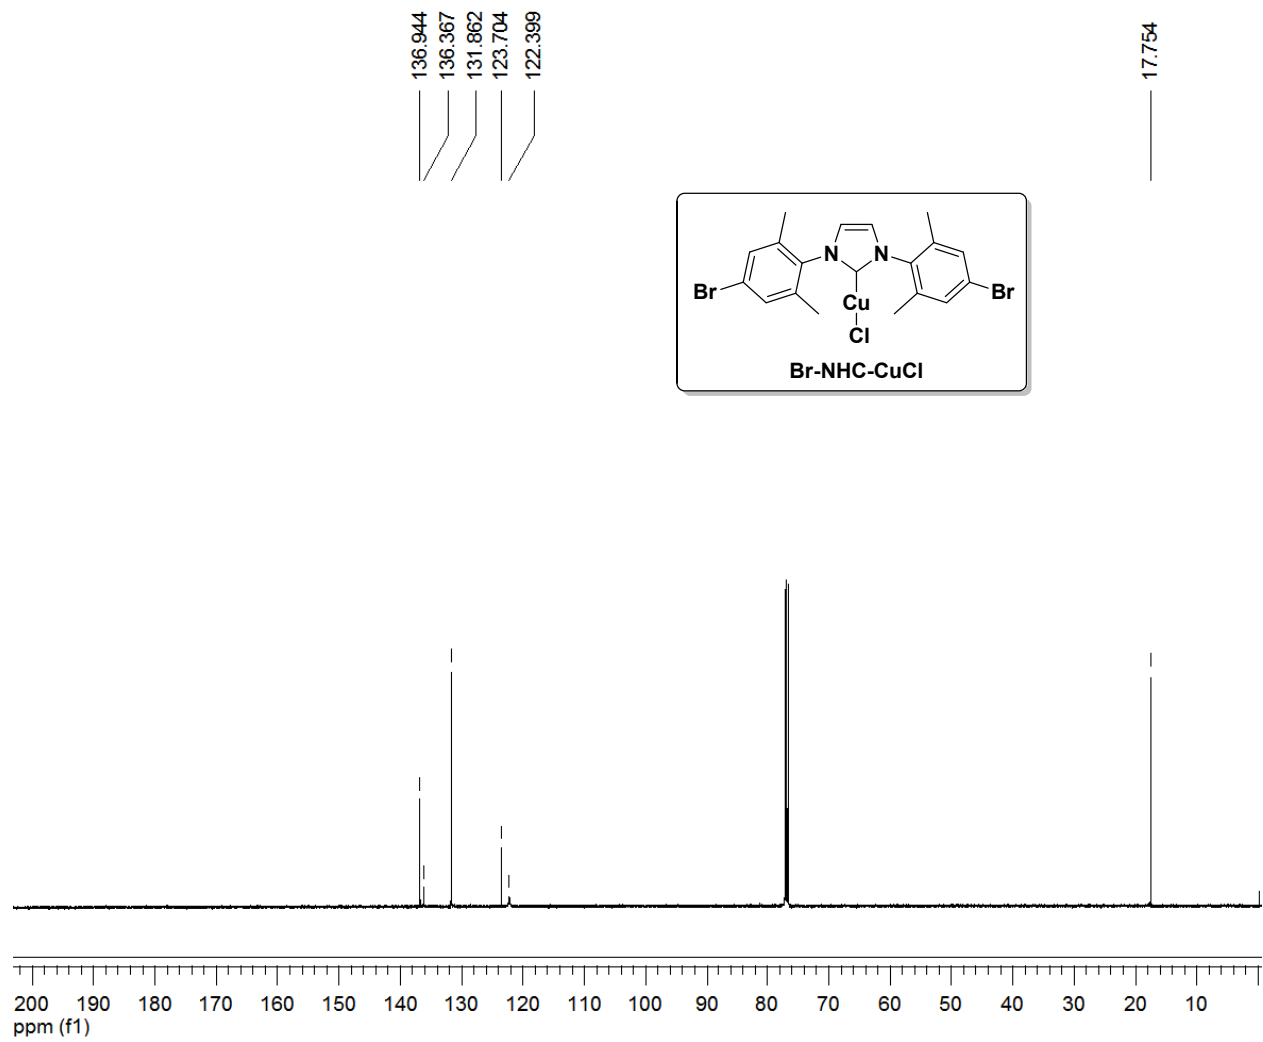

**Figure S5.**  $^{13}\text{C}$  NMR spectrum of **Br-NHC-CuCl** (125 MHz,  $\text{CDCl}_3$ )
